# Supplementary material for: Controlling phase separated domains in UV-curable formulations with OH-functionalized prepolymers
Source: Royal Society of Chemistry journal article supplement (doi:10.1039/d2py00159d), 2022-01-01
Supplement: d2py00159d1.pdf [file d2py00159d1.pdf]

## Supplementary Section

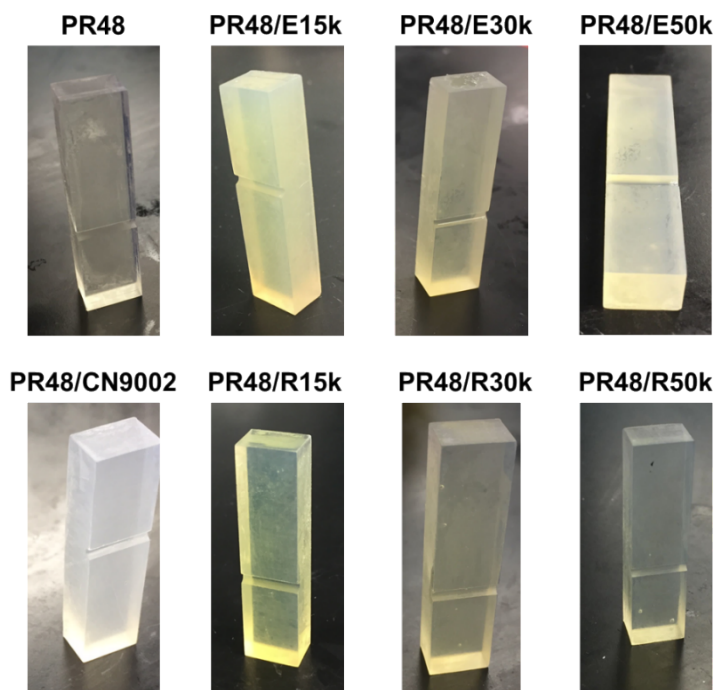

**Figure S1.** Photographs of 3D printed object after UV post-curing.

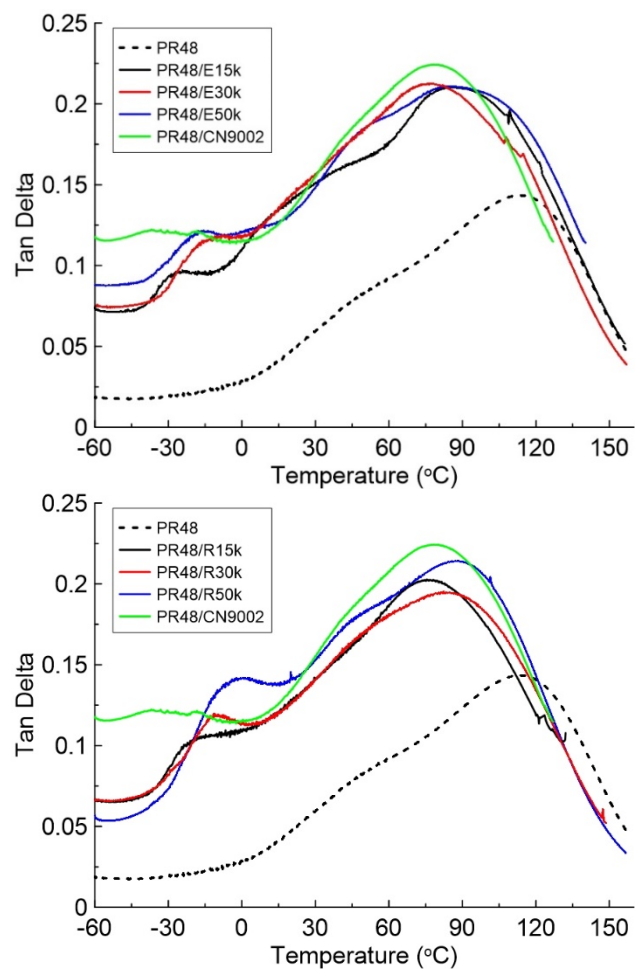

**Figure S2.** Tan( $\delta$ ) profiles as a function of temperature for PR48 systems modified with a) end-functionalized and b) random-functionalized oligomers. The system modified with CN9002 system is also included. Samples are photopolymerized at 20 mW/cm<sup>2</sup> for 10 min using 0.5 wt % TPO.
